# Supplementary material
Source: PubMed Central journal article supplement (PMC6449499)
Supplement: NIHMS1014191-supplement-1.pdf [file NIHMS1014191-supplement-1.pdf]

# Cognitive Bias and Symptom Importance, Main Analyses

Chris Beevers

8/9/2018

This report includes code snippets used to generate results for all the analyses reported in Beevers et al., *Association between negative cognitive bias and depression: A symptom-level approach*.

R packages used in this analysis. Note that the beset package is not available on CRAN, but can be found here: <https://github.com/jashu/beset>

```
library(knitr); library(haven)
library(tidyverse)
library(beset)
library(gridExtra); library(ggpubr)
library(irr)
```

## Demographic data

Summarize sample. Table 1.

```
#age
kable(demo %>%
  dplyr::summarize(N = n_distinct(id),
    age_mean = mean(age, na.rm = TRUE),
    age_sd = sd(age, na.rm = TRUE)))
```

| N   | age_mean | age_sd   |
|-----|----------|----------|
| 218 | 23.29358 | 4.877868 |

```
#gender
kable(demo %>%
  group_by(female) %>%
  summarise(n = n()) %>%
  mutate(freq = (n / sum(n))*100) %>%
  ungroup())
```

| female | n   | freq     |
|--------|-----|----------|
| 0      | 74  | 33.94495 |
| 1      | 144 | 66.05505 |

```
#hispanic
kable(demo %>%
  group_by(hispanic) %>%
  summarise(n = n()) %>%
  mutate(freq = (n / sum(n))*100) %>%
```

```
ungroup()
```

| hispanic | n   | freq     |
|----------|-----|----------|
| 0        | 151 | 69.26605 |
| 1        | 67  | 30.73394 |

```
#white (2 individuals indicated an additional race)
```

```
kable(demo %>%  
  group_by(white) %>%  
  summarise(n = n()) %>%  
  mutate(freq = (n / sum(n))*100) %>%  
  ungroup())
```

| white | n   | freq       |
|-------|-----|------------|
| 0     | 2   | 0.9174312  |
| 1     | 216 | 99.0825688 |

```
#never married
```

```
kable(demo %>%  
  group_by(never_marry_yn) %>%  
  summarise(n = n()) %>%  
  mutate(freq = (n / sum(n))*100) %>%  
  ungroup())
```

| never_marry_yn | n   | freq     |
|----------------|-----|----------|
| 0              | 33  | 15.13761 |
| 1              | 185 | 84.86239 |

```
#years in school
```

```
kable(demo %>%  
  dplyr::summarize(  
    yis_mean = mean(years_of_school, na.rm = TRUE),  
    yis_sd = sd(years_of_school, na.rm = TRUE)))
```

| yis_mean | yis_sd   |
|----------|----------|
| 14.42661 | 2.387878 |

```
#private health insurance
```

```
kable(demo %>%  
  group_by(priv_ins_yn) %>%  
  summarise(n = n()) %>%  
  mutate(freq = (n / sum(n))*100) %>%  
  ungroup())
```

| priv_ins_yn | n   | freq       |
|-------------|-----|------------|
| 0           | 91  | 41.7431193 |
| 1           | 126 | 57.7981651 |

| priv_ins_yn | n | freq      |
|-------------|---|-----------|
| NA          | 1 | 0.4587156 |

```
#household income
kable(demo %>%
  group_by(financial_support) %>%
  summarise(n = n()) %>%
  mutate(freq = (n / sum(n))*100) %>%
  ungroup())
```

| financial_support | n  | freq      |
|-------------------|----|-----------|
| 1                 | 84 | 38.532110 |
| 2                 | 45 | 20.642202 |
| 3                 | 26 | 11.926606 |
| 4                 | 19 | 8.715596  |
| 5                 | 44 | 20.183486 |

```
#mdd
kable(demo %>%
  group_by(mdd_current_meets) %>%
  summarise(n = n()) %>%
  mutate(freq = (n / sum(n))*100) %>%
  ungroup())
```

| mdd_current_meets | n   | freq       |
|-------------------|-----|------------|
| 0                 | 156 | 71.5596330 |
| 1                 | 60  | 27.5229358 |
| NA                | 2   | 0.9174312  |

```
#lifetime mdd
kable(demo %>%
  group_by(mdd_past_meets) %>%
  summarise(n = n()) %>%
  mutate(freq = (n / sum(n))*100) %>%
  ungroup())
```

| mdd_past_meets | n   | freq      |
|----------------|-----|-----------|
| 0              | 83  | 38.073394 |
| 1              | 132 | 60.550459 |
| NA             | 3   | 1.376147  |

```
#any current anxiety disorder
kable(demo %>%
  group_by(tot_cur_anxiety_yn) %>%
  summarise(n = n()) %>%
  mutate(freq = (n / sum(n))*100) %>%
  ungroup())
```

| tot_cur_anxiety_yn | n   | freq       |
|--------------------|-----|------------|
| 0                  | 154 | 70.6422018 |
| 1                  | 62  | 28.4403670 |
| NA                 | 2   | 0.9174312  |

```
#any current disorder
kable(demo %>%
  group_by(tot_cur_diag_yn) %>%
  summarise(n = n()) %>%
  mutate(freq = (n / sum(n))*100) %>%
  ungroup())
```

| tot_cur_diag_yn | n   | freq      |
|-----------------|-----|-----------|
| 0               | 100 | 45.871560 |
| 1               | 115 | 52.752294 |
| NA              | 3   | 1.376147  |

```
#BDI
kable(demo %>%
  dplyr::summarize(
    bdi_mean = mean(bdi_total, na.rm = TRUE),
    bdi_sd = sd(bdi_total, na.rm = TRUE)))
```

| bdi_mean | bdi_sd   |
|----------|----------|
| 17.98165 | 11.55231 |

```
cor.test(demo$mdd_current_meets, demo$tot_cur_anxiety_yn)
```

```
##
## Pearson's product-moment correlation
##
## data: demo$mdd_current_meets and demo$tot_cur_anxiety_yn
## t = 5.6538, df = 214, p-value = 4.982e-08
## alternative hypothesis: true correlation is not equal to 0
## 95 percent confidence interval:
## 0.2384841 0.4713116
## sample estimates:
## cor
## 0.3605002
```

Last paragraph of the participants section.

```
#comorbidity between current MDD and anxiety disorder
kable(demo %>%
  group_by(mdd_anx_comor) %>%
  summarise(n = n()) %>%
  mutate(freq = (n / sum(n))*100) %>%
  ungroup())
```

| mdd_anx_comor | n   | freq       |
|---------------|-----|------------|
| 0             | 183 | 83.9449541 |
| 1             | 33  | 15.1376147 |
| NA            | 2   | 0.9174312  |

```
#of those with current MDD, how many have an anxiety disorder
kable(demo %>%
  filter(mdd_current_meets==1) %>%
  group_by(tot_cur_anxiety_yn) %>%
  summarise(n = n()) %>%
  mutate(freq = (n / sum(n))*100) %>%
  ungroup())
```

| tot_cur_anxiety_yn | n  | freq |
|--------------------|----|------|
| 0                  | 27 | 45   |
| 1                  | 33 | 55   |

## Inter-rater reliability for MINI interviews

```
rater_test <- filter(rater, field == "MDD Current")
kappam.fleiss(rater_test[,c(2,3,4)])
```

```
## Fleiss' Kappa for m Raters
##
## Subjects = 22
## Raters = 3
## Kappa = 1
##
## z = 8.12
## p-value = 4.44e-16
```

```
rater_test <- filter(rater, field == "MDD Lifetime")
kappam.fleiss(rater_test[,c(2,3,4)])
```

```
## Fleiss' Kappa for m Raters
##
## Subjects = 22
## Raters = 3
## Kappa = 0.812
##
## z = 6.6
## p-value = 4.21e-11
```

```
rater_test <- filter(rater, field == "MDD Recurrent")
kappam.fleiss(rater_test[,c(2,3,4)])
```

```
## Fleiss' Kappa for m Raters
##
## Subjects = 22
## Raters = 3
```

```

##      Kappa = 0.939
##
##      z = 7.63
##      p-value = 2.33e-14
rater_test <- filter(rater, field == "Panic Disorder Current")
kappam.fleiss(rater_test[,c(2,3,4)])

## Fleiss' Kappa for m Raters
##
## Subjects = 22
## Raters = 3
## Kappa = 1
##
##      z = 8.12
##      p-value = 4.44e-16
rater_test <- filter(rater, field == "Panic Disorder Lifetime")
kappam.fleiss(rater_test[,c(2,3,4)])

## Fleiss' Kappa for m Raters
##
## Subjects = 22
## Raters = 3
## Kappa = 1
##
##      z = 8.12
##      p-value = 4.44e-16
rater_test <- filter(rater, field == "GAD Current")
kappam.fleiss(rater_test[,c(2,3,4)])

## Fleiss' Kappa for m Raters
##
## Subjects = 21
## Raters = 3
## Kappa = 1
##
##      z = 7.94
##      p-value = 2e-15
rater_test <- filter(rater, field == "Alcohol Use Disorder Current" )
kappam.fleiss(rater_test[,c(2,3,4)])

## Fleiss' Kappa for m Raters
##
## Subjects = 22
## Raters = 3
## Kappa = 0.858
##
##      z = 6.97
##      p-value = 3.2e-12
rater_test <- filter(rater, field == "OCD Current" )
kappam.fleiss(rater_test[,c(2,3,4)])

## Fleiss' Kappa for m Raters
##

```

```
## Subjects = 22
## Raters = 3
## Kappa = 0.784
##
## z = 6.37
## p-value = 1.94e-10
```

## Split-half reliability for SRET metrics

Number of negative words endorsed.

```
library(boot)
cor.mu <- function(df, n) {
  df = df[n,]
  x <- df$even
  y <- df$odd
  return(cor(x, y, use = "complete.obs", method = "spearman"))
}

sret_bias <- sret_summary %>%
  select(id, trial_type, num.neg.words) %>%
  spread(trial_type, num.neg.words)

boot.cor.mu <- boot(sret_bias, cor.mu, R = 10000)
boot.cor.mu
```

```
##
## ORDINARY NONPARAMETRIC BOOTSTRAP
##
##
## Call:
## boot(data = sret_bias, statistic = cor.mu, R = 10000)
##
##
## Bootstrap Statistics :
##   original      bias   std. error
## t1* 0.9100278 -0.002026475  0.01178537
```

```
boot.ci(boot.cor.mu, type = "norm")
```

```
## BOOTSTRAP CONFIDENCE INTERVAL CALCULATIONS
## Based on 10000 bootstrap replicates
##
## CALL :
## boot.ci(boot.out = boot.cor.mu, type = "norm")
##
## Intervals :
## Level      Normal
## 95%      ( 0.8890,  0.9352 )
## Calculations and Intervals on Original Scale
```

```
ggscatter(sret_bias, x = "even", y = "odd",
  add = "reg.line",
  add.params = list(color = "red", fill = "lightgray"),
```

```

conf.int = TRUE) +
stat_cor(method = "spearman", label.x = 5, label.y = 30) +
labs(x = "Number of Negative Words Endorsed Even Trials",
     y = "Number of Negative Words Endorsed Odd Trials")

```

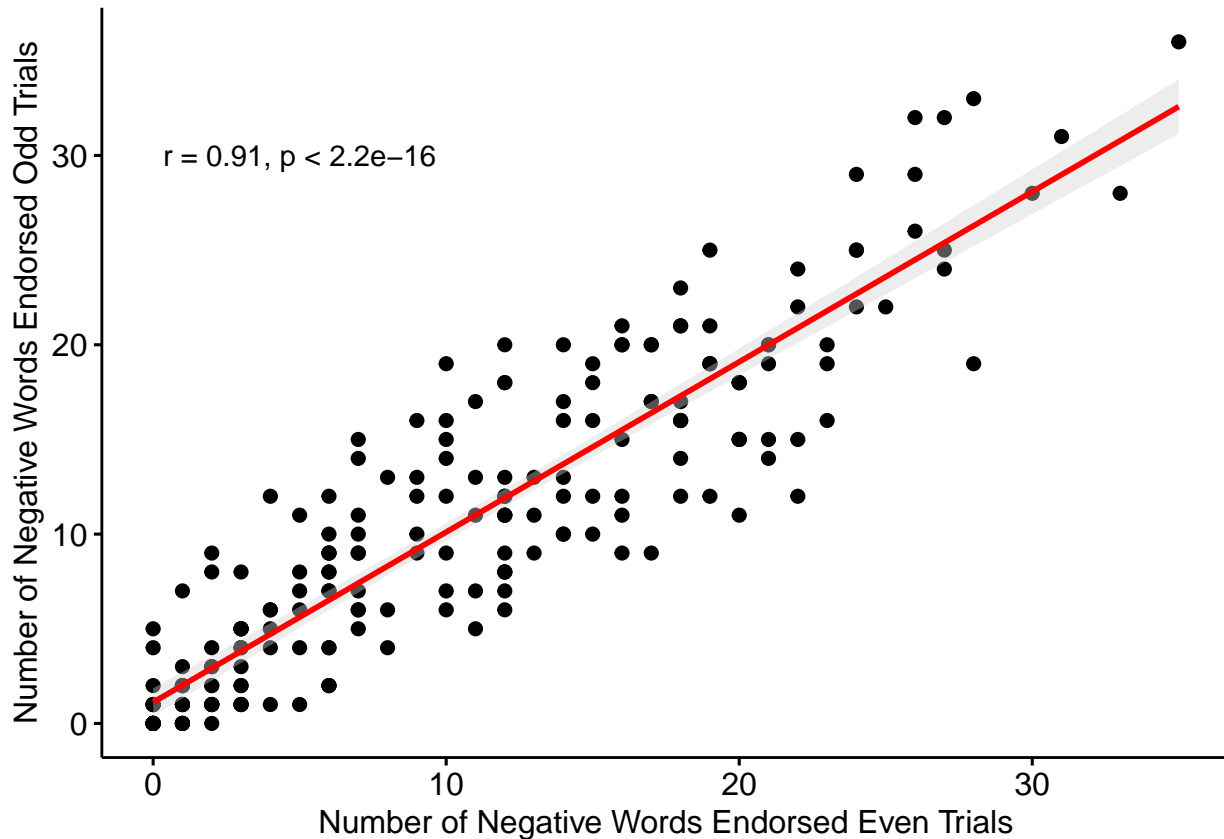

The spearman rho for number of negative words endorsed using 10,000 bootstrap samples is excellent,  $\rho = 0.91$ , 95% CI [.89, .94]. Note that for these analyses only we used a simple count and didn't require endorsements on two of three repetitions because for these analyses we split the data into even and odd trials.

Drift rate.

```

drift_bias <- drift %>%
  select(id, trial_type, v_negative) %>%
  spread(trial_type, v_negative) %>%
  mutate(even = as.numeric(even),
         odd = as.numeric(odd))

```

```

boot.cor.mu <- boot(drift_bias, cor.mu, R = 10000)
boot.cor.mu

```

```

##
## ORDINARY NONPARAMETRIC BOOTSTRAP
##
##
## Call:
## boot(data = drift_bias, statistic = cor.mu, R = 10000)
##
##
## Bootstrap Statistics :

```



```
##      original      bias      std. error
## t1* 0.7639311 -0.00254327 0.03810449

boot.ci(boot.cor.mu, type = "norm")

## BOOTSTRAP CONFIDENCE INTERVAL CALCULATIONS
## Based on 10000 bootstrap replicates
##
## CALL :
## boot.ci(boot.out = boot.cor.mu, type = "norm")
##
## Intervals :
## Level      Normal
## 95%      ( 0.6918, 0.8412 )
## Calculations and Intervals on Original Scale

ggscatter(drift_bias, x = "even", y = "odd",
  add = "reg.line",
  add.params = list(color = "red", fill = "lightgray"),
  conf.int = TRUE) +
stat_cor(method = "spearman", label.x = -4.5, label.y = 1.5) +
labs(x = "Drift Rate Even Trials",
  y = "Drift Rate Odd Trials")
```

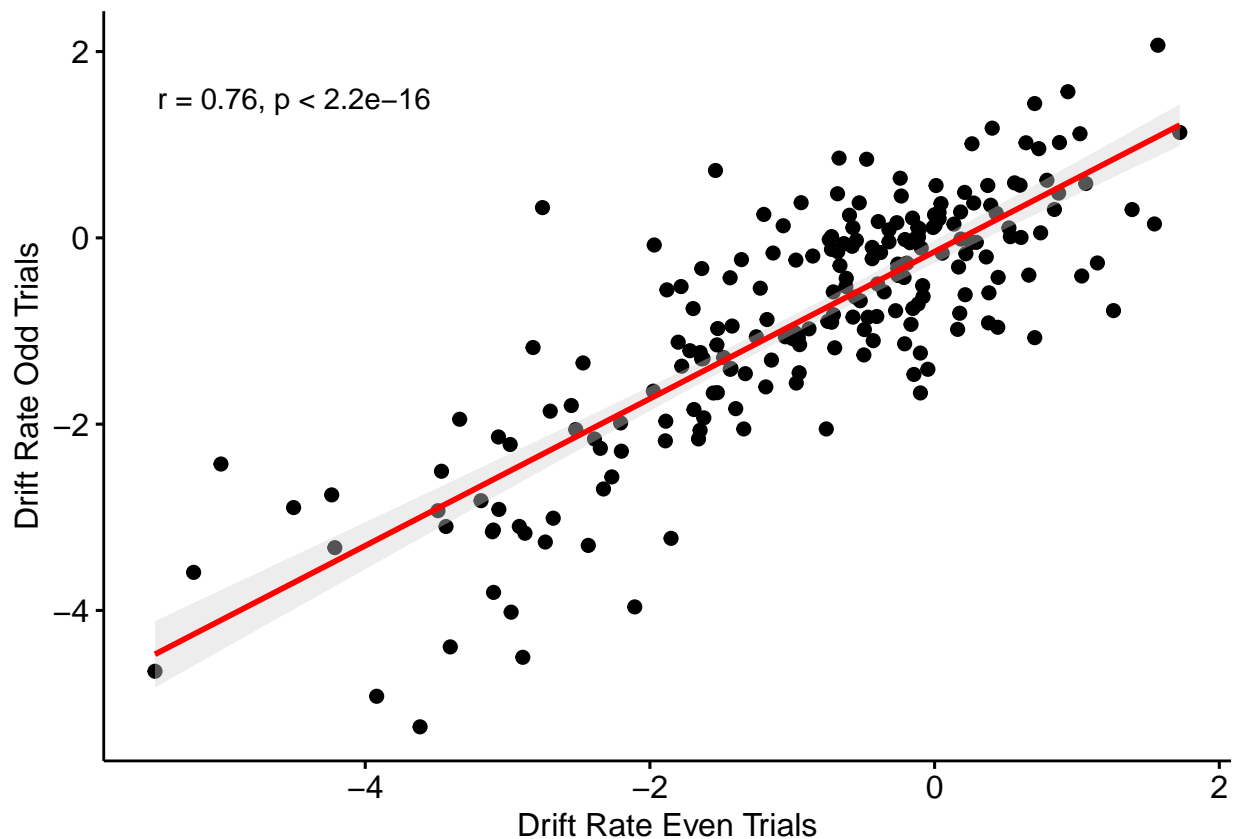

The spearman rho for drift rate for negative words using 10,000 bootstrap samples is good,  $\rho = 0.76$ , 95% CI [.69, .84]. Reliability is good despite using a technique (diffusion model) that typically requires a larger number of trials than what we used in the current study, especially given that for reliability analyses we split analyses into even and odd trials.

## Number of trials dropped because of wrong response or outlier

```
(96-mean(bias_missing$n_dp_valid))/96*100
```

```
## [1] 9.84805
```

There were 96 trials involving sad stimuli. Thus, the percentage of trials missing due to incorrect response or deemed an outlier was 9.84%.

```
load(file="~/Box/Active/Projects/R56/papers/symptom importance/data/r56_dp_drop_session1.RData")
```

```
demo <- left_join(demo, bias_missing)
```

```
## Joining, by = "id"
```

```
demo <- left_join(demo, dp_drop)
```

```
## Joining, by = "id"
```

```
ggscatter(demo[which(demo$dp_keep==1),], x = "n_dp_valid", y = "bdi_total",  
  add = "reg.line",  
  add.params = list(color = "red", fill = "lightgray"),  
  conf.int = TRUE) +  
stat_cor(method = "pearson", label.x = 55, label.y = 53) +  
labs(x = "# valid dot-probe trials",  
  y = "BDI-II total") +  
theme(legend.position = "none")
```

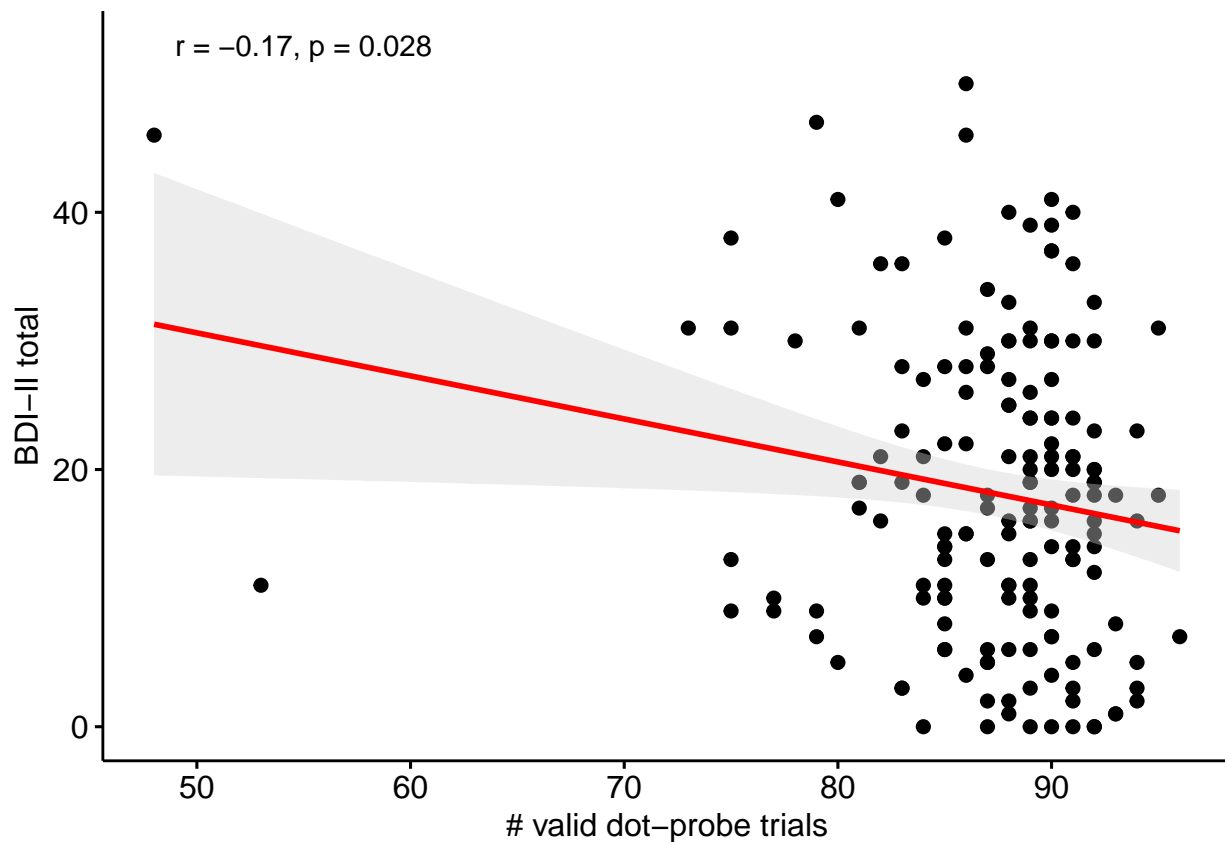

Among those retained for dot-probe analyses, there was a small correlation between number of valid trials and depression severity ( $r = -0.17$ ). People with higher depression severity had fewer valid trials. However,

all retained participants had at least 70 trials with good data, except for two participants who had 50 and 53 good trials, respectively. Thus, we believe the amount of analyzed data was adequate, regardless of depression severity. Perhaps not surprisingly, people with higher depression severity were more likely to make mistakes or respond too slowly or quickly.

## Split-half reliability for dot-probe metrics

Spearman rho for traditional RT.

```
trad_bias <- bias_summary %>%
  select(id, trial_type, dp_bias) %>%
  spread(trial_type, dp_bias)

boot.cor.mu <- boot(trad_bias, cor.mu, R = 10000)
boot.cor.mu

##
## ORDINARY NONPARAMETRIC BOOTSTRAP
##
## Call:
## boot(data = trad_bias, statistic = cor.mu, R = 10000)
##
## Bootstrap Statistics :
##      original      bias   std. error
## t1* 0.0122489 -0.002136211  0.08000153

boot.ci(boot.cor.mu, type = "norm")

## BOOTSTRAP CONFIDENCE INTERVAL CALCULATIONS
## Based on 10000 bootstrap replicates
##
## CALL :
## boot.ci(boot.out = boot.cor.mu, type = "norm")
##
## Intervals :
## Level      Normal
## 95%      (-0.1424,  0.1712 )
## Calculations and Intervals on Original Scale

ggscatter(trad_bias, x = "even", y = "odd",
  add = "reg.line",
  add.params = list(color = "red", fill = "lightgray"),
  conf.int = TRUE) +
  stat_cor(method = "spearman", label.x = -.13, label.y = .1) +
  labs(x = "Traditional Bias Score Even Trials (s)",
  y = "Traditional Bias Score Odd Trials (s)")
```

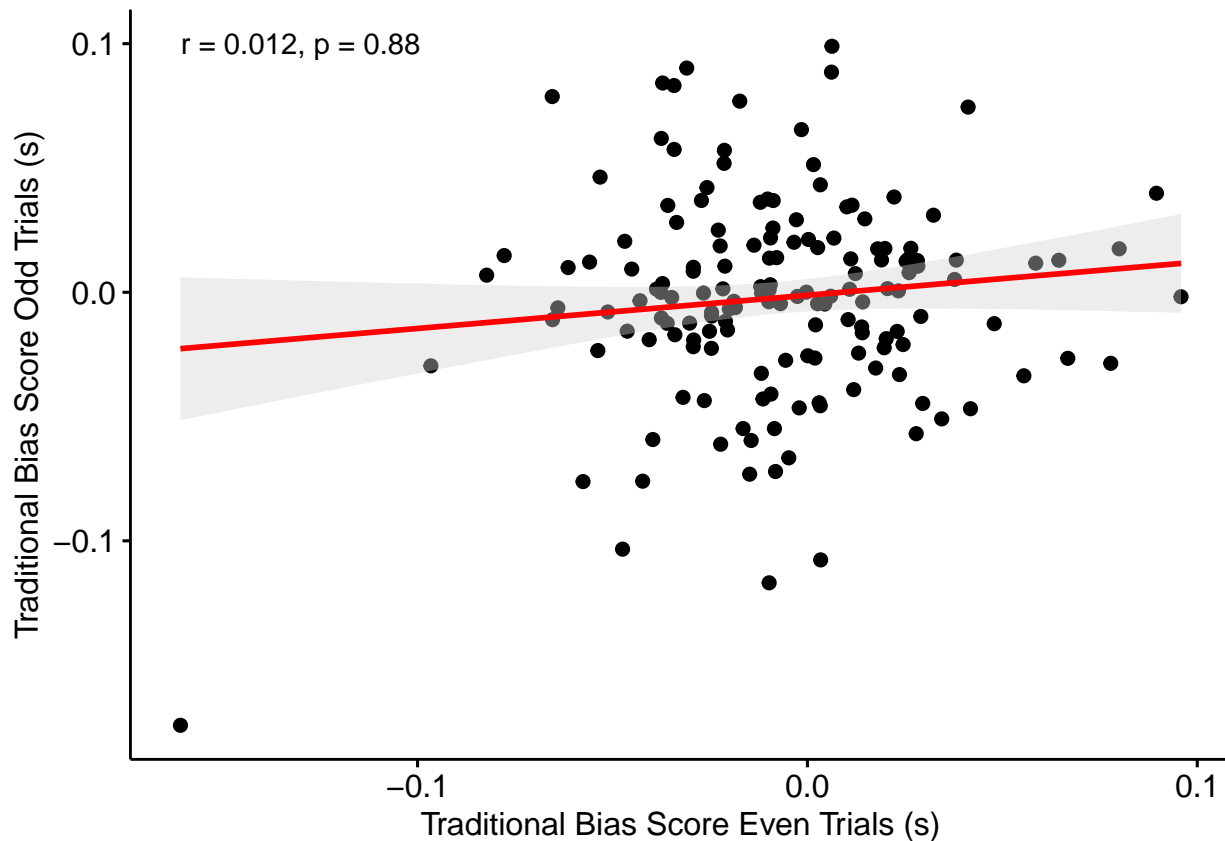

The spearman rho for the traditional bias score measured with reaction time is very poor,  $\rho = 0.012$ , 95% CI [-0.14, 0.17].

Spearman rho for TLBS towards sad stimuli.

```
tlbs_bias <- bias_summary %>%
  select(id, trial_type, mean_dp_toward) %>%
  spread(trial_type, mean_dp_toward)

boot.cor.mu <- boot(tlbs_bias, cor.mu, R = 10000)
boot.cor.mu

##
## ORDINARY NONPARAMETRIC BOOTSTRAP
##
## Call:
## boot(data = tlbs_bias, statistic = cor.mu, R = 10000)
##
##
## Bootstrap Statistics :
##   original      bias   std. error
## t1* 0.8029416 -0.004289624 0.03210412

boot.ci(boot.cor.mu, type = "norm")

## BOOTSTRAP CONFIDENCE INTERVAL CALCULATIONS
## Based on 10000 bootstrap replicates
##
## CALL :
```

```

## boot.ci(boot.out = boot.cor.mu, type = "norm")
##
## Intervals :
## Level      Normal
## 95%      ( 0.7443, 0.8702 )
## Calculations and Intervals on Original Scale

ggscatter(tlbs_bias, x = "even", y = "odd",
  add = "reg.line",
  add.params = list(color = "red", fill = "lightgray"),
  conf.int = TRUE) +
stat_cor(method = "spearman", label.x = .07, label.y = .2) +
labs(x = "TLBS Toward Sad Stimuli Even Trials (s)",
  y = "TLBS Toward Sad Stimuli Odd Trials (s)")

```

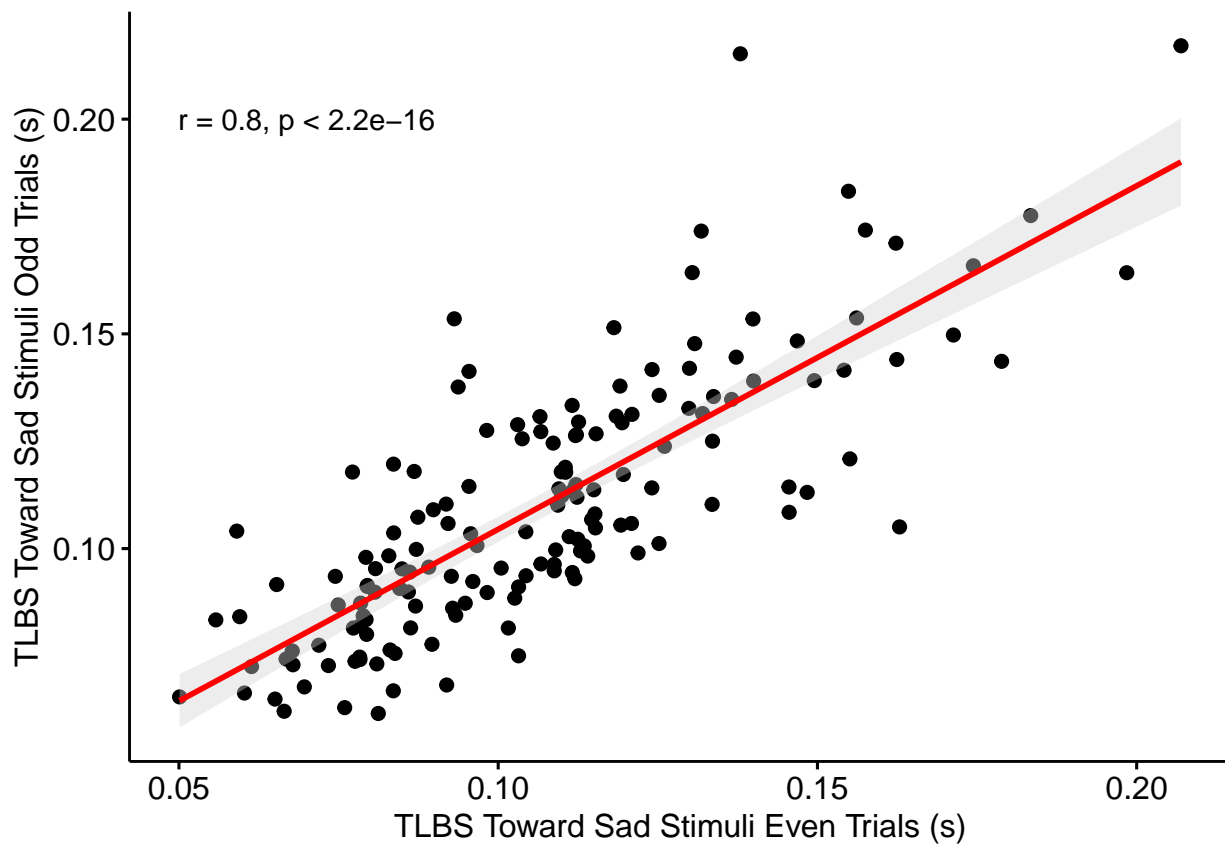

The spearman rho for the tlbs towards sad stimuli measured with reaction time is very good,  $\rho = 0.80$ , 95% CI [.74, .87].

Spearman rho for eye gaze bias score for sad stimuli.

```

gz_bias <- bias_summary %>%
  select(id, trial_type, gaze_bias) %>%
  spread(trial_type, gaze_bias)

boot.cor.mu <- boot(gz_bias, cor.mu, R = 10000)
boot.cor.mu

```

```

##
## ORDINARY NONPARAMETRIC BOOTSTRAP
##

```

```

##
## Call:
## boot(data = gz_bias, statistic = cor.mu, R = 10000)
##
##
## Bootstrap Statistics :
##      original      bias    std. error
## t1* 0.1556757 -0.0003830148 0.08370235
boot.ci(boot.cor.mu, type = "norm")

## BOOTSTRAP CONFIDENCE INTERVAL CALCULATIONS
## Based on 10000 bootstrap replicates
##
## CALL :
## boot.ci(boot.out = boot.cor.mu, type = "norm")
##
## Intervals :
## Level      Normal
## 95%      (-0.0080, 0.3201 )
## Calculations and Intervals on Original Scale
ggscatter(gz_bias, x = "even", y = "odd",
  add = "reg.line",
  add.params = list(color = "red", fill = "lightgray"),
  conf.int = TRUE) +
stat_cor(method = "spearman", label.x = .15, label.y = .2) +
labs(x = "Eye Gaze Bias Even Trials (s)",
  y = "Eye Gaze Bias Odd Trials (s)")

```

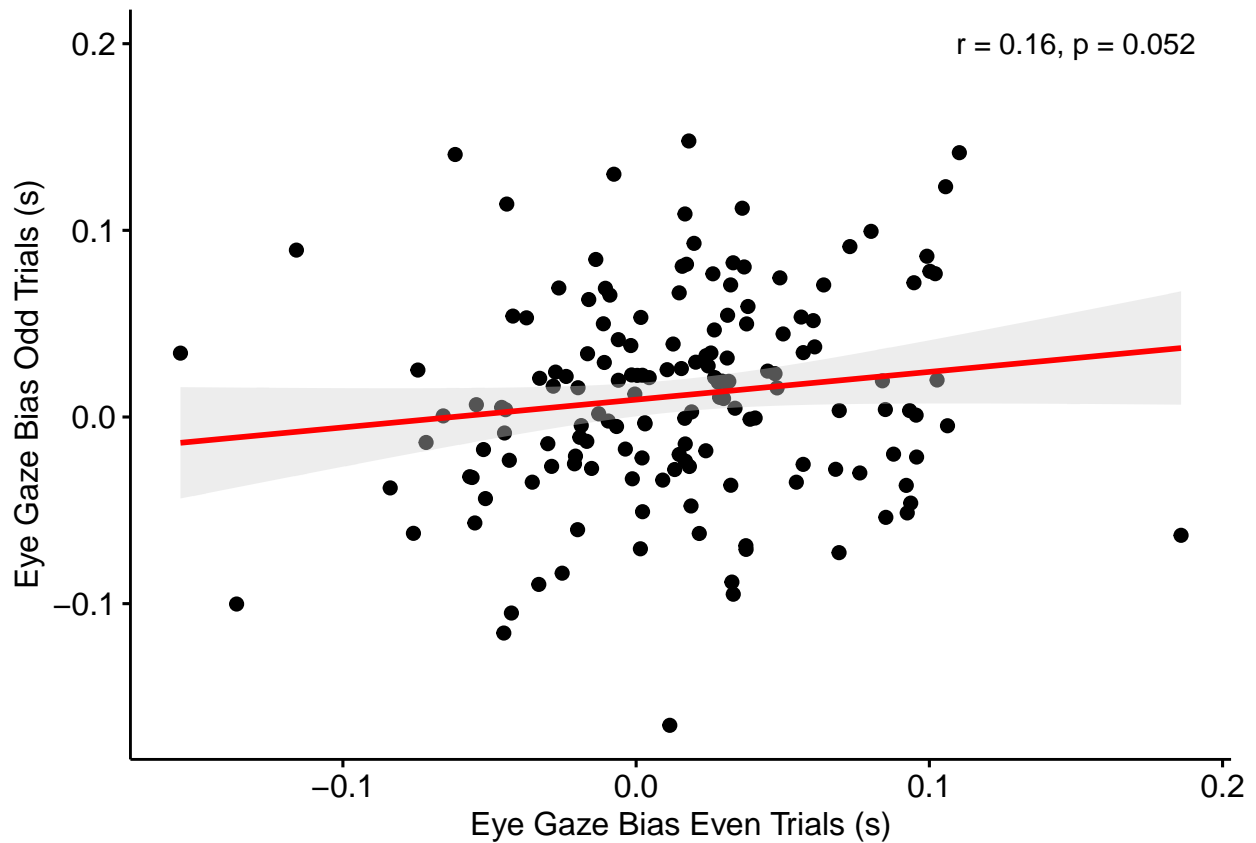

The spearman rho for eye gaze bias is also very low,  $\rho = 0.16$ , 95% CI [-0.01, .32].

Spearman rho for percentage of trials where total fixation is greater for sad than neutral stimuli.

```
gz_pct_bias <- bias_summary %>%
  select(id, trial_type, pct_gaze_toward) %>%
  spread(trial_type, pct_gaze_toward)
```

```
boot.cor.mu <- boot(gz_pct_bias, cor.mu, R = 10000)
boot.cor.mu
```

```
##
## ORDINARY NONPARAMETRIC BOOTSTRAP
##
## Call:
## boot(data = gz_pct_bias, statistic = cor.mu, R = 10000)
##
##
## Bootstrap Statistics :
##   original      bias   std. error
## t1* 0.1439954 -0.0007671209 0.08244898
```

```
boot.ci(boot.cor.mu, type = "norm")
```

```
## BOOTSTRAP CONFIDENCE INTERVAL CALCULATIONS
## Based on 10000 bootstrap replicates
##
## CALL :
## boot.ci(boot.out = boot.cor.mu, type = "norm")
```

```
##
## Intervals :
## Level      Normal
## 95%      (-0.0168, 0.3064 )
## Calculations and Intervals on Original Scale
ggscatter(gz_pct_bias, x = "even", y = "odd",
  add = "reg.line",
  add.params = list(color = "red", fill = "lightgray"),
  conf.int = TRUE) +
stat_cor(method = "spearman", label.x = .32, label.y = .67) +
labs(x = "% Gaze Towards Sad Stimuli Even Trials (s)",
  y = "% Gaze Towards Sad Stimuli Odd Trials (s)")
```

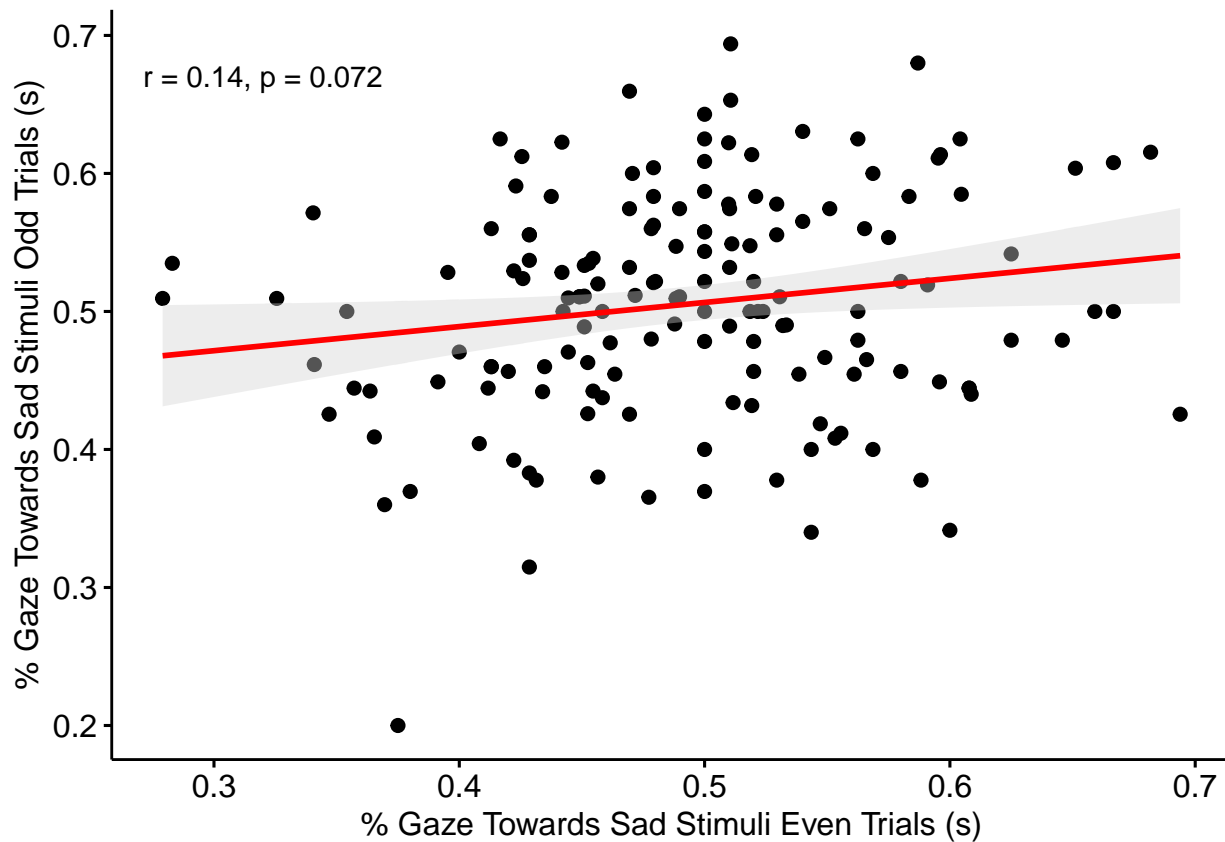

The spearman rho for percentage of trials towards sad stimuli is also low,  $\rho = 0.14$ , 95% CI [-0.02, .30]. Thus, the TLBS towards sad stimuli is the only dot-probe index with acceptable internal reliability. Nevertheless, the traditional scoring of the dot-probe is used so often that we will retain those metrics for analyses, bearing in mind their poor psychometric characteristics.

## SRET: Drift rate

Random forest model for drift rate.

```
drift_rf <- beset_rf(v_negative ~ ., data=bdi[,c(2:23)])
summary(drift_rf)
```

```
## Type of random forest: regression
```



```

## Number of trees: 500
## No. of variables tried at each split: 7
## =====
## OOB estimate of % Var explained: 39.81
## CV estimate of % Var explained: 40.74
##
##      Importance      Min  Max
## pre_bdi_1      0.233 0.219 0.246
## pre_bdi_7      0.129 0.117 0.140
## pre_bdi_2      0.103 0.094 0.111
## pre_bdi_14     0.087 0.078 0.097
## pre_bdi_6      0.081 0.073 0.088
## pre_bdi_13     0.068 0.059 0.077
## pre_bdi_11     0.047 0.040 0.053
## pre_bdi_9      0.034 0.029 0.040
## pre_bdi_15     0.033 0.027 0.039
## pre_bdi_17     0.033 0.027 0.039
## pre_bdi_8      0.031 0.024 0.037
## pre_bdi_4      0.024 0.017 0.031
## pre_bdi_5      0.023 0.018 0.028
## pre_bdi_19     0.017 0.011 0.022
## pre_bdi_12     0.014 0.008 0.020
## pre_bdi_16     0.011 0.007 0.016
## pre_bdi_20     0.011 0.006 0.015
## pre_bdi_21     0.009 0.005 0.012
## pre_bdi_10     0.006 0.003 0.010
## pre_bdi_18     0.006 0.002 0.010
## pre_bdi_3      0.002 -0.002 0.006
##
##
## Prediction Metrics
## (Results of 10-fold cross-validation repeated 10 times)
##      Mean  S.E.  Min  Max
## Mean Absolute Error 0.749 0.0376 0.732 0.759
## Mean Cross Entropy  1.430 0.0540 1.410 1.440
## Mean Squared Error  1.020 0.1070 0.986 1.040
## Variance Explained  0.402 0.0539 0.392 0.423
## =====
#importance plot
imp_drift_rf <- imp_drift_rf <- beset::importance(drift_rf)
fig_imp_drift_rf <- plot(imp_drift_rf, p_max = 21, labels = names_bdi)
fig_imp_drift_rf

```

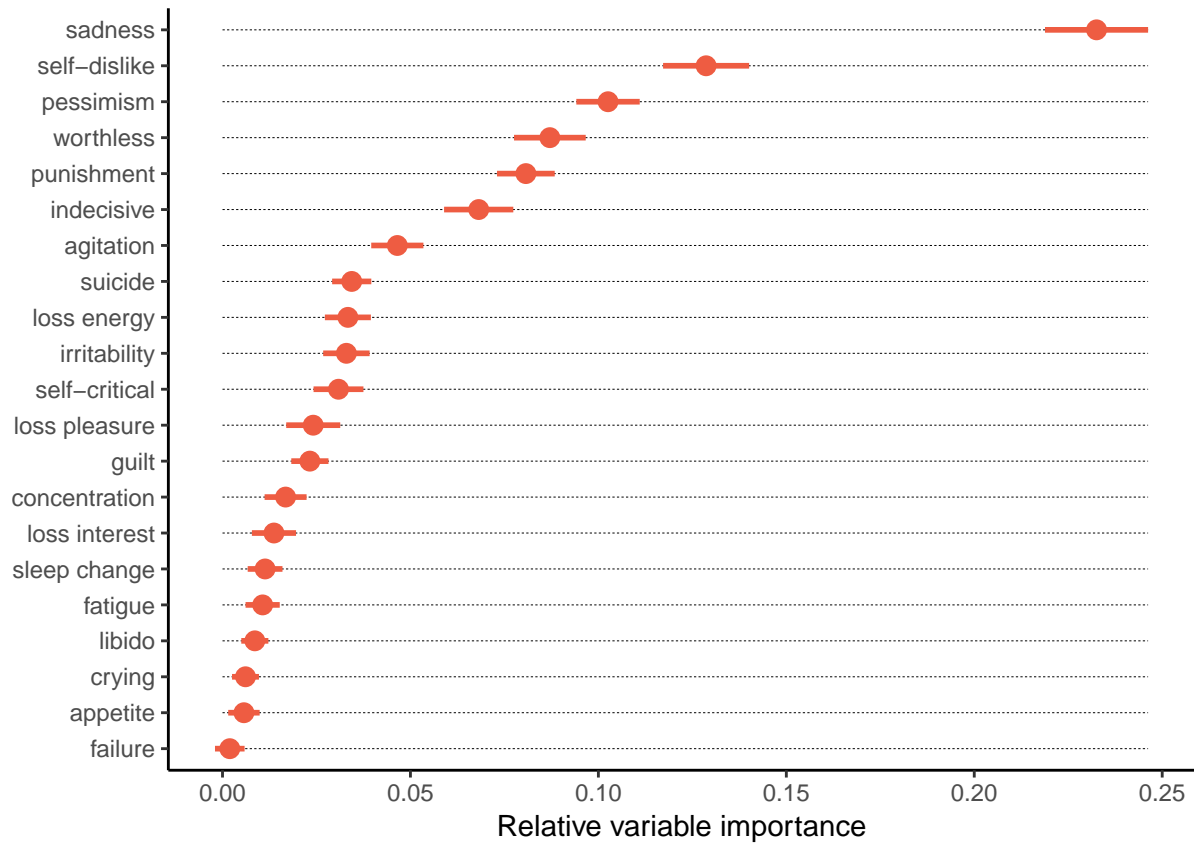

```

#dependence plots
dep_drift_rf <- beset::dependence(drift_rf,
  y_lab = "Drift rate for negative words",
  x_lab = c("sadness", "pessimism", "failure",
    "loss pleasure", "guilt", "punishment",
    "self-dislike", "self-critical",
    "suicide", "crying", "agitation",
    "loss interest", "indecisive",
    "worthless", "loss energy", "sleep change",
    "irritability", "appetite", "concentration",
    "fatigue", "libido"))
fig_dep_drift_rf <- plot(dep_drift_rf, order = "import")

```

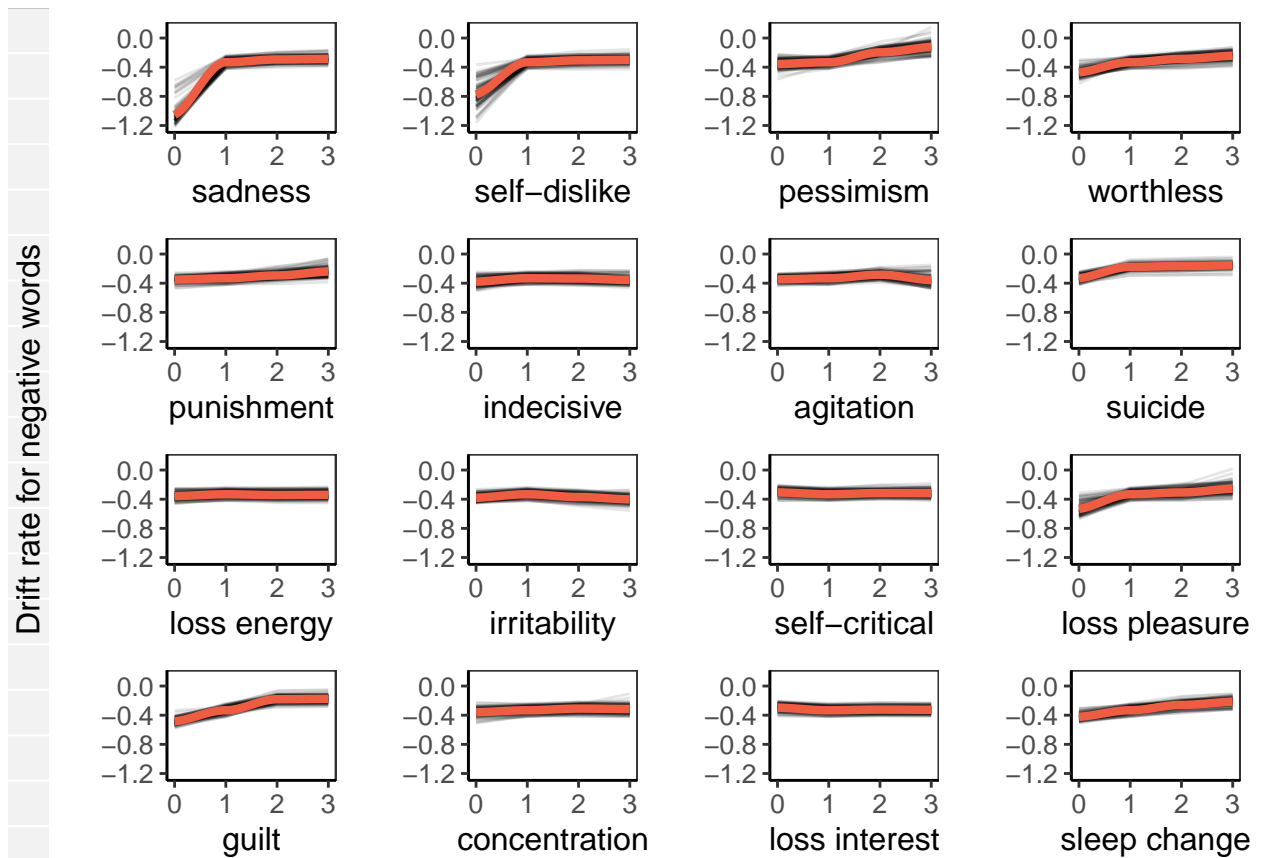

fig\_dep\_drift\_rf

```
## TableGrob (4 x 5) "arrange": 17 grobs
##           z   cells   name           grob
## sadness   1 (1-1,2-2) arrange      gtable[layout]
## self-dislike 2 (1-1,3-3) arrange      gtable[layout]
## pessimism   3 (1-1,4-4) arrange      gtable[layout]
## worthless   4 (1-1,5-5) arrange      gtable[layout]
## punishment  5 (2-2,2-2) arrange      gtable[layout]
## indecisive  6 (2-2,3-3) arrange      gtable[layout]
## agitation   7 (2-2,4-4) arrange      gtable[layout]
## suicide     8 (2-2,5-5) arrange      gtable[layout]
## loss energy  9 (3-3,2-2) arrange      gtable[layout]
## irritability 10 (3-3,3-3) arrange     gtable[layout]
## self-critical 11 (3-3,4-4) arrange     gtable[layout]
## loss pleasure 12 (3-3,5-5) arrange     gtable[layout]
## guilt       13 (4-4,2-2) arrange      gtable[layout]
## concentration 14 (4-4,3-3) arrange     gtable[layout]
## loss interest 15 (4-4,4-4) arrange     gtable[layout]
## sleep change 16 (4-4,5-5) arrange     gtable[layout]
##           17 (1-4,1-1) arrange text[GRID.text.1118]
```

```
## Saving 6.5 x 4.5 in image
```

Random forest with reduced number of symptoms.

```
drift_rf_red <- beset_rf(v_negative ~ ., data=bdi[,c(2, 3, 9, 4, 16, 8, 15, 13)])
summary(drift_rf_red)
```

```

## Type of random forest: regression
## Number of trees: 500
## No. of variables tried at each split: 2
## =====
## OOB estimate of % Var explained: 38.58
## CV estimate of % Var explained: 40.32
##
##           Importance   Min    Max
## pre_bdi_1      0.268 0.254 0.282
## pre_bdi_6      0.173 0.162 0.185
## pre_bdi_7      0.154 0.142 0.166
## pre_bdi_14     0.127 0.116 0.138
## pre_bdi_13     0.120 0.110 0.131
## pre_bdi_2      0.082 0.073 0.091
## pre_bdi_11     0.075 0.064 0.086
##
##
## Prediction Metrics
## (Results of 10-fold cross-validation repeated 10 times)
##           Mean   S.E.   Min   Max
## Mean Absolute Error 0.756 0.0377 0.746 0.772
## Mean Cross Entropy  1.440 0.0558 1.430 1.460
## Mean Squared Error  1.040 0.1090 1.020 1.080
## Variance Explained  0.391 0.0460 0.370 0.406
## =====

```

Compare full and reduced models.

```

#drift rate
drift_rf_full <- validate(drift_rf)
drift_rf_redu <- validate(drift_rf_red)

compare(drift_rf_full, drift_rf_redu)

```

```

##           Model1 Model2   Delta 95% CI for Delta
## Mean Absolute Error 0.749 0.756 0.00709 [-0.035, 0.05]
## Mean Cross Entropy  1.430 1.440 0.00962 [-0.044, 0.063]
## Mean Squared Error  1.022 1.042 0.01988 [-0.089, 0.13]
## Variance Explained  0.402 0.391 -0.01162 [-0.075, 0.054]

```

Alternate models, elastic net.

```

#nested cross-validation to tune and then test
drift_elnet <- beset_elnet(v_negative ~ ., data=bdi[,c(2:23)], nest_cv = TRUE)
summary(drift_elnet)

```

```

##
## Results of nested 10-fold cross-validation repeated 10 times
## =====
## Most conservative tuning parameters within
## 1 SE of best cross-validation Mean Squared Error:
##           Mean   S.E.       Range
## alpha  0.990 0.000   0.99 - 0.99
## lambda 0.247 0.013 0.239 - 0.256
##
##
## Non-zero coefficients ranked in order of importance:

```

```

##           Stnd.Coeff.  S.E.   Min   Max
## pre_bdi_1           0.163 0.007 0.161 0.164
## pre_bdi_7           0.116 0.007 0.114 0.120
## pre_bdi_6           0.065 0.007 0.062 0.068
## pre_bdi_2           0.059 0.008 0.058 0.063
## pre_bdi_5           0.046 0.005 0.043 0.048
## pre_bdi_13          0.046 0.006 0.043 0.050
## pre_bdi_4           0.045 0.007 0.043 0.046
## pre_bdi_8           0.010 0.005 0.006 0.016
## pre_bdi_16          0.006 0.004 0.003 0.009
## pre_bdi_9           0.003 0.003 0.000 0.006
## pre_bdi_19          0.003 0.003 0.001 0.004
## pre_bdi_14          0.002 0.002 0.000 0.005
## pre_bdi_12          0.001 0.001 0.000 0.004
##
##
## Prediction Metrics:
##           Variance Explained   S.E.   Min   Max
## Train Sample                   0.383 0.0082 0.379 0.390
## CV-Tune Holdout                 0.337 0.0418 0.330 0.343
## CV-Test Holdout                 0.341 0.0269 0.322 0.353
## =====

```

Compare elastic net and random forest.

```

sum_drift_en <- validate(drift_elfnet)
sum_drift_rf <- validate(drift_rf)

compare(sum_drift_en, sum_drift_rf)

##           Model1 Model2   Delta 95% CI for Delta
## Mean Absolute Error  0.803  0.749 -0.0540 [-0.11, 0.0035]
## Mean Cross Entropy   1.479  1.430 -0.0487  [-0.12, 0.02]
## Mean Squared Error   1.127  1.022 -0.1046  [-0.27, 0.04]
## Variance Explained   0.341  0.402  0.0612  [-0.027, 0.14]

```

## SRET: Endorsements of negative words as self-descriptive.

Random forest.

```

neg_end_rf <- beset_rf(num.neg.endorsed ~ ., data=bdi[,c(1, 3:23)])
summary(neg_end_rf)

```

```

## Type of random forest: regression
## Number of trees: 500
## No. of variables tried at each split: 7
## =====
## OOB estimate of % Var explained: 44.56
## CV estimate of % Var explained: 45.68
##
##           Importance   Min   Max
## pre_bdi_1           0.286 0.272 0.300
## pre_bdi_6           0.202 0.189 0.215
## pre_bdi_14          0.132 0.118 0.145

```

```

## pre_bdi_7      0.086  0.077  0.094
## pre_bdi_5      0.071  0.062  0.079
## pre_bdi_9      0.049  0.042  0.056
## pre_bdi_13     0.031  0.024  0.039
## pre_bdi_16     0.030  0.024  0.037
## pre_bdi_17     0.029  0.023  0.035
## pre_bdi_2      0.026  0.020  0.032
## pre_bdi_19     0.020  0.015  0.026
## pre_bdi_4      0.015  0.009  0.021
## pre_bdi_11     0.013  0.008  0.018
## pre_bdi_18     0.004 -0.001  0.010
## pre_bdi_15     0.004  0.000  0.008
## pre_bdi_8      0.003 -0.001  0.007
## pre_bdi_3      0.003 -0.002  0.007
## pre_bdi_20     0.002 -0.002  0.006
## pre_bdi_12     0.001 -0.003  0.005
## pre_bdi_10     -0.003 -0.006  0.001
## pre_bdi_21     -0.004 -0.008 -0.001
##
##
## Prediction Metrics
## (Results of 10-fold cross-validation repeated 10 times)
##           Mean  S.E.   Min  Max
## Mean Absolute Error  3.450 0.1930  3.380  3.51
## Mean Cross Entropy   2.930 0.0559  2.910  2.95
## Mean Squared Error  20.600 2.2600 19.900 21.30
## Variance Explained   0.453 0.0560  0.433  0.47
## =====
#importance plot
imp_end_rf <- beset::importance(neg_end_rf)
fig_imp_end_rf <- plot(imp_end_rf, p_max = 21, labels = names_bdi)
fig_imp_end_rf

```

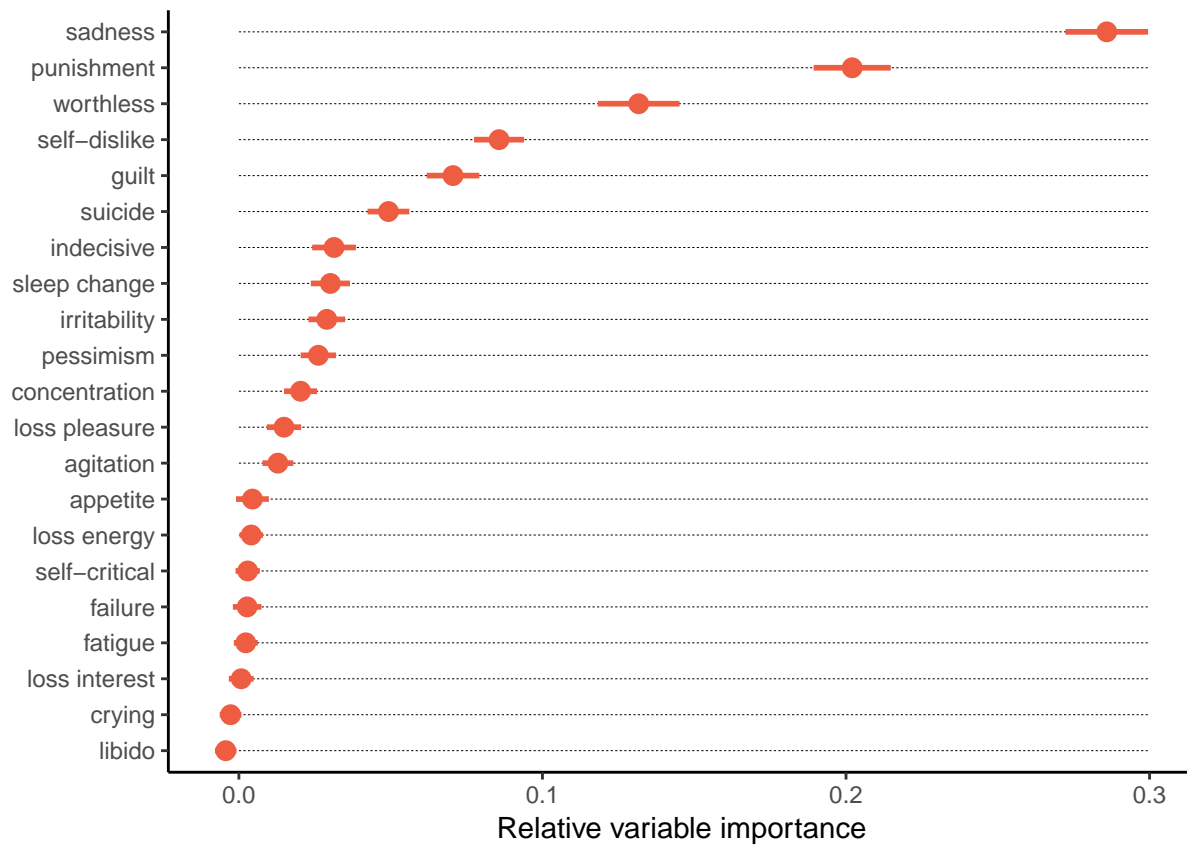

```

#dependence plots
dep_end_rf <- beset::dependence(neg_end_rf,
  y_lab = "Endorsement of negative words",
  x_lab = c("sadness", "pessimism", "failure",
    "loss pleasure", "guilt", "punishment",
    "self-dislike", "self-critical",
    "suicide", "crying", "agitation",
    "loss interest", "indecisive",
    "worthless", "loss energy", "sleep change",
    "irritability", "appetite", "concentration",
    "fatigue", "libido"))
fig_dep_end_rf <- plot(dep_end_rf, order = "import")

```

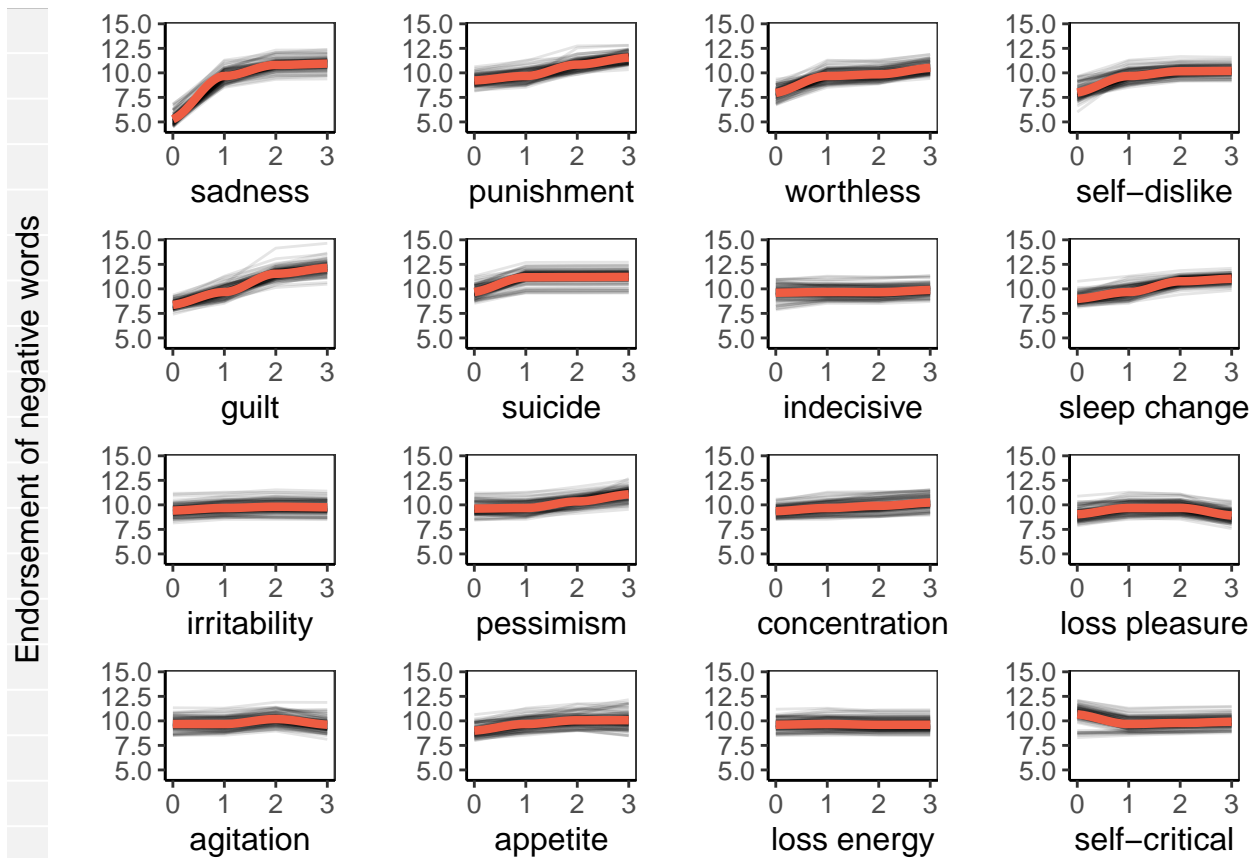

fig\_dep\_end\_rf

```
## TableGrob (4 x 5) "arrange": 17 grobs
##           z   cells   name   grob
## sadness   1 (1-1,2-2) arrange gtable[layout]
## punishment 2 (1-1,3-3) arrange gtable[layout]
## worthless  3 (1-1,4-4) arrange gtable[layout]
## self-dislike 4 (1-1,5-5) arrange gtable[layout]
## guilt      5 (2-2,2-2) arrange gtable[layout]
## suicide    6 (2-2,3-3) arrange gtable[layout]
## indecisive 7 (2-2,4-4) arrange gtable[layout]
## sleep change 8 (2-2,5-5) arrange gtable[layout]
## irritability 9 (3-3,2-2) arrange gtable[layout]
## pessimism  10 (3-3,3-3) arrange gtable[layout]
## concentration 11 (3-3,4-4) arrange gtable[layout]
## loss pleasure 12 (3-3,5-5) arrange gtable[layout]
## agitation  13 (4-4,2-2) arrange gtable[layout]
## appetite   14 (4-4,3-3) arrange gtable[layout]
## loss energy 15 (4-4,4-4) arrange gtable[layout]
## self-critical 16 (4-4,5-5) arrange gtable[layout]
##           17 (1-4,1-1) arrange text[GRID.text.1967]
```

## Saving 6.5 x 4.5 in image

Random forest with reduced number of symptoms.

```
neg_end_rf_red <- beset_rf(num.neg.endorsed ~ ., data=bdi[,c(1, 3, 8, 16, 9, 7, 11)])
summary(neg_end_rf_red)
```



```

## Type of random forest: regression
## Number of trees: 500
## No. of variables tried at each split: 2
## =====
## OOB estimate of % Var explained: 46.34
## CV estimate of % Var explained: 47.19
##
##           Importance   Min    Max
## pre_bdi_1      0.408 0.396 0.420
## pre_bdi_6      0.247 0.235 0.260
## pre_bdi_7      0.100 0.092 0.108
## pre_bdi_5      0.095 0.087 0.103
## pre_bdi_14     0.094 0.085 0.102
## pre_bdi_9      0.056 0.049 0.063
##
##
## Prediction Metrics
## (Results of 10-fold cross-validation repeated 10 times)
##           Mean   S.E.   Min   Max
## Mean Absolute Error  3.470 0.1900  3.420  3.55
## Mean Cross Entropy   2.920 0.0551  2.900  2.94
## Mean Squared Error  19.900 2.1600 19.200 20.80
## Variance Explained   0.469 0.0554  0.447  0.49
## =====

```

Compare full and reduced models.

```

end_rf_full <- validate(neg_end_rf)
end_rf_redu <- validate(neg_end_rf_red)

compare(end_rf_full, end_rf_redu)

```

```

##           Model1 Model2   Delta 95% CI for Delta
## Mean Absolute Error  3.451  3.469  0.0181  [-0.17, 0.21]
## Mean Cross Entropy   2.931  2.915 -0.0153  [-0.061, 0.029]
## Mean Squared Error  20.560 19.944 -0.6167  [-2.5, 1.2]
## Variance Explained   0.453  0.469  0.0164  [-0.032, 0.066]

```

Alternative model, best subsets regression with negative binomial distribution.

```

#this models takes a while to run, so will not run it here
sret_negbin <- beset_glm(num.neg.endorsed ~ ., data=bdi[,c(1, 3:23)],
                        p_max = 10, family = "negbin")

saveRDS(sret_negbin, file = rds_file)

sret_negbin <- readRDS(file = rds_file)

summary(sret_negbin, oneSE = FALSE)

```

```

##
## =====
## Best Model:
## ~ pre_bdi_1 + pre_bdi_5 + pre_bdi_6 + pre_bdi_7 + pre_bdi_9 + pre_bdi_13 + pre_bdi_16
##
## 82 Nearly Equivalent Models:
## ~ pre_bdi_1 + pre_bdi_2 + pre_bdi_4 + pre_bdi_5 + pre_bdi_6 + pre_bdi_9 + pre_bdi_16

```

```

## ~ pre_bdi_1 + pre_bdi_2 + pre_bdi_5 + pre_bdi_6 + pre_bdi_7 + pre_bdi_9 + pre_bdi_11
## ~ pre_bdi_1 + pre_bdi_2 + pre_bdi_5 + pre_bdi_6 + pre_bdi_7 + pre_bdi_9 + pre_bdi_13
## ~ pre_bdi_1 + pre_bdi_2 + pre_bdi_5 + pre_bdi_6 + pre_bdi_7 + pre_bdi_9 + pre_bdi_16
## ~ pre_bdi_1 + pre_bdi_2 + pre_bdi_5 + pre_bdi_6 + pre_bdi_7 + pre_bdi_9 + pre_bdi_19
## ...
## + 77 more
## ...
##
## Coefficients:
##           Estimate
## (Intercept)  1.04300
## pre_bdi_1    0.33390
## pre_bdi_5    0.11770
## pre_bdi_6    0.15900
## pre_bdi_7    0.10090
## pre_bdi_9    0.20490
## pre_bdi_13   0.07407
## pre_bdi_16   0.13160
##
## (Dispersion parameter for Negative Binomial(3.3748) family taken to be 1)
##
## Log-likelihood: -609.6 on 9 Df
## AIC: 1237.1
##
## Number of Fisher Scoring iterations: 1
##
## Train-sample R-squared = 0.39
## Cross-validated R-squared = 0.35
## =====
summary(sret_negbin)
##
## =====
## Best Model:
## ~ pre_bdi_1 + pre_bdi_6
##
## Nearly Equivalent Model:
## ~ pre_bdi_1 + pre_bdi_5
##
## Coefficients:
##           Estimate
## (Intercept)  1.3040
## pre_bdi_1    0.5963
## pre_bdi_6    0.2510
##
## (Dispersion parameter for Negative Binomial(2.5903) family taken to be 1)
##
## Log-likelihood: -624.8 on 4 Df
## AIC: 1257.6
##
## Number of Fisher Scoring iterations: 1
##
## Train-sample R-squared = 0.31
## Cross-validated R-squared = 0.29

```

```
## =====
```

## Dot-Probe: Reaction Time Metrics

Random forest for traditional dot-probe metric.

```
rt_bias_rf <- beset_rf(dp_bias ~ ., data=dp_bias[,c(1:21, 24)])  
summary(rt_bias_rf)
```

```
## Type of random forest: regression  
## Number of trees: 500  
## No. of variables tried at each split: 7  
## =====  
## OOB estimate of % Var explained: -13.25  
## CV estimate of % Var explained: -9.47  
##  
##           Importance    Min    Max  
## pre_bdi_12      0.246 0.209 0.283  
## pre_bdi_18      0.117 0.089 0.145  
## pre_bdi_1       0.091 0.062 0.119  
## pre_bdi_5       0.085 0.060 0.111  
## pre_bdi_17     0.077 0.052 0.102  
## pre_bdi_4       0.064 0.037 0.092  
## pre_bdi_8       0.052 0.033 0.071  
## pre_bdi_19     0.044 0.024 0.065  
## pre_bdi_6       0.041 0.021 0.060  
## pre_bdi_14     0.038 0.018 0.058  
## pre_bdi_2       0.035 0.023 0.047  
## pre_bdi_11     0.030 0.013 0.047  
## pre_bdi_15     0.028 0.012 0.043  
## pre_bdi_20     0.020 0.008 0.033  
## pre_bdi_21     0.018 -0.001 0.038  
## pre_bdi_7       0.016 0.000 0.032  
## pre_bdi_3       0.011 -0.007 0.029  
## pre_bdi_16     0.009 -0.008 0.026  
## pre_bdi_13     0.002 -0.017 0.022  
## pre_bdi_10    -0.009 -0.025 0.008  
## pre_bdi_9     -0.015 -0.027 -0.004  
##  
##  
## Prediction Metrics  
## (Results of 10-fold cross-validation repeated 10 times)  
##           Mean    S.E.    Min    Max  
## Mean Absolute Error  0.022100 0.001310 0.021600 0.022700  
## Mean Cross Entropy  -2.090000 0.075100 -2.100000 -2.060000  
## Mean Squared Error   0.000901 0.000158 0.000878 0.000942  
## Variance Explained  -0.124000 0.063900 -0.174000 -0.094600  
## =====
```

Random forest for TLBS bias towards sad stimuli.

```
tlbs_bias_rf <- beset_rf(mean_dp_toward ~ ., data=dp_bias[,c(1:21, 27)])  
summary(tlbs_bias_rf)
```

```

## Type of random forest: regression
## Number of trees: 500
## No. of variables tried at each split: 7
## =====
## OOB estimate of % Var explained: -6.45
## CV estimate of % Var explained: -0.37
##
##           Importance    Min    Max
## pre_bdi_13      0.265  0.237  0.292
## pre_bdi_15      0.127  0.104  0.150
## pre_bdi_8       0.110  0.090  0.131
## pre_bdi_19      0.086  0.067  0.105
## pre_bdi_1       0.081  0.062  0.100
## pre_bdi_20      0.064  0.040  0.088
## pre_bdi_14      0.063  0.044  0.082
## pre_bdi_11      0.048  0.032  0.063
## pre_bdi_3       0.043  0.024  0.063
## pre_bdi_12      0.036  0.021  0.052
## pre_bdi_10      0.031  0.017  0.045
## pre_bdi_17      0.028  0.012  0.043
## pre_bdi_7       0.024  0.007  0.041
## pre_bdi_2       0.014 -0.002  0.031
## pre_bdi_4       0.012 -0.002  0.026
## pre_bdi_16      0.007 -0.012  0.025
## pre_bdi_6       0.003 -0.012  0.017
## pre_bdi_9      -0.004 -0.012  0.005
## pre_bdi_18     -0.004 -0.020  0.012
## pre_bdi_5      -0.007 -0.028  0.013
## pre_bdi_21     -0.027 -0.042 -0.012
##
##
## Prediction Metrics
## (Results of 10-fold cross-validation repeated 10 times)
##           Mean    S.E.    Min    Max
## Mean Absolute Error  0.022500  1.08e-03  0.022000  0.02290
## Mean Cross Entropy  -2.120000  5.08e-02 -2.130000 -2.09000
## Mean Squared Error   0.000852  7.93e-05  0.000819  0.00090
## Variance Explained  -0.033200  7.72e-02 -0.090700  0.00757
## =====

```

Random forest for eye gaze bias.

```

gz_bias_rf <- beset_rf(gaze_bias ~ ., data=dp_bias[,c(1:21, 30)])
summary(gz_bias_rf)

```

```

## Type of random forest: regression
## Number of trees: 500
## No. of variables tried at each split: 7
## =====
## OOB estimate of % Var explained: -17.83
## CV estimate of % Var explained: -11.91
##
##           Importance    Min    Max
## pre_bdi_12      0.206  0.178  0.235
## pre_bdi_15      0.155  0.129  0.182

```

```

## pre_bdi_4      0.142  0.117  0.166
## pre_bdi_1      0.106  0.085  0.126
## pre_bdi_7      0.078  0.056  0.100
## pre_bdi_18     0.072  0.052  0.091
## pre_bdi_10     0.070  0.052  0.088
## pre_bdi_17     0.062  0.046  0.077
## pre_bdi_20     0.056  0.039  0.072
## pre_bdi_16     0.055  0.039  0.071
## pre_bdi_19     0.039  0.018  0.059
## pre_bdi_2      0.037  0.023  0.051
## pre_bdi_3      0.019  0.003  0.035
## pre_bdi_11     0.018  0.003  0.033
## pre_bdi_14     0.006 -0.008  0.019
## pre_bdi_8      -0.009 -0.025  0.008
## pre_bdi_5      -0.011 -0.025  0.003
## pre_bdi_6      -0.016 -0.028 -0.005
## pre_bdi_13     -0.017 -0.031 -0.003
## pre_bdi_9      -0.023 -0.033 -0.013
## pre_bdi_21     -0.042 -0.057 -0.026

```

```

##
##
## Prediction Metrics
## (Results of 10-fold cross-validation repeated 10 times)
##           Mean      S.E.      Min      Max
## Mean Absolute Error  0.03310 0.001400  0.03270  0.03390
## Mean Cross Entropy  -1.75000 0.046100 -1.76000 -1.73000
## Mean Squared Error   0.00178 0.000163  0.00174  0.00183
## Variance Explained  -0.15200 0.051500 -0.18300 -0.12500
## =====

```

Random forest for percentage of trials towards sad stimuli.

```
pct_gz_bias <- beset_rf(pct_gaze_toward ~ ., data=dp_bias[,c(1:21, 34)])
summary(pct_gz_bias)
```

```

## Type of random forest: regression
## Number of trees: 500
## No. of variables tried at each split: 7
## =====
## OOB estimate of % Var explained: -11.86
## CV estimate of % Var explained: -7.84
##
##           Importance      Min      Max
## pre_bdi_1      0.174  0.154  0.193
## pre_bdi_4      0.167  0.139  0.195
## pre_bdi_18     0.091  0.063  0.119
## pre_bdi_16     0.072  0.051  0.093
## pre_bdi_2      0.071  0.055  0.087
## pre_bdi_10     0.068  0.050  0.087
## pre_bdi_15     0.059  0.037  0.082
## pre_bdi_3      0.048  0.030  0.067
## pre_bdi_13     0.043  0.021  0.065
## pre_bdi_7      0.037  0.019  0.055
## pre_bdi_14     0.037  0.018  0.055
## pre_bdi_20     0.034  0.014  0.054

```

```

## pre_bdi_11      0.032  0.015  0.048
## pre_bdi_12      0.025  0.004  0.046
## pre_bdi_21      0.024  0.006  0.042
## pre_bdi_19      0.023  0.004  0.042
## pre_bdi_17      0.022  0.007  0.037
## pre_bdi_8       0.018  0.000  0.036
## pre_bdi_9      -0.002 -0.013  0.009
## pre_bdi_6      -0.015 -0.028 -0.001
## pre_bdi_5      -0.030 -0.045 -0.015
##
##
## Prediction Metrics
## (Results of 10-fold cross-validation repeated 10 times)
##           Mean    S.E.    Min    Max
## Mean Absolute Error  0.05230 0.00181  0.05150  0.05350
## Mean Cross Entropy  -1.31000 0.03700 -1.32000 -1.29000
## Mean Squared Error   0.00431 0.00032  0.00419  0.00448
## Variance Explained  -0.11400 0.05800 -0.15900 -0.08500
## =====

```

Bivariate correlations.

```

library(apaTables)
apa.cor.table(dp_bias[,c(24, 27, 30, 34, 40)],
              filename=table2,
              table.number=2,
              landscape = FALSE)

```

```

##
##
## Table 2
##
## Means, standard deviations, and correlations with confidence intervals
##
##
## Variable          M    SD    1          2          3
## 1. dp_bias        -0.00 0.03
##
## 2. mean_dp_toward  0.11  0.03  .31**
##                   [.17, .44]
##
## 3. gaze_bias       0.01  0.04  .32**    .10
##                   [.18, .45]  [-.05, .25]
##
## 4. pct_gaze_toward 0.50  0.06  .16*     .03     .72**
##                   [.01, .31]  [-.12, .18] [.64, .79]
##
## 5. bdi_total       18.21 11.73 -0.00    .22**   -0.04
##                   [-.15, .15] [.07, .36]  [-.19, .11]
##
## 4
##
##
##
##

```
